# Supplementary material for: Effect of coordinating (–CN) vs. non-coordinating (–F) substituents in 3-pyridyl urea receptors toward second sphere sulfate recognition: selective crystallisation of CuSO4 from mixtures of competing anions/cations
Source: Royal Society of Chemistry journal article supplement (doi:10.1039/c3ce40974k), 2013-01-01

## Supporting Information

### **Effect of coordinating (-CN) Vs non-coordinating (-F) substituents in 3-pyridyl urea receptors toward second sphere sulfate recognition: Selective crystallisation of CuSO<sub>4</sub> from mixtures of competing anions/ cations.**

Bidyut Akhuli, Tamal Kanti Ghosh and Pradyut Ghosh\*

*Indian Association for the Cultivation of Science, 2A&2B Raja S. C. Mullick  
Road, Kolkata 700 032,*

*India. Fax: (+91) 33-2473-2805*

*E-mail: [icpg@iacs.res.in](mailto:icpg@iacs.res.in)*

## Table of Contents

|                                                                                                                     |            |
|---------------------------------------------------------------------------------------------------------------------|------------|
| <b>Table 1S.</b> Metal-Ligand bond distances in complex <b>1</b> .....                                              | <b>3S</b>  |
| <b>Table 2S.</b> Hydrogen bonding table for complex <b>1</b> .....                                                  | <b>3S</b>  |
| <b>Figure 1S.</b> Scattered plot of complex <b>1</b> .....                                                          | <b>3S</b>  |
| <b>Table 3S.</b> Metal-Ligand bond distances in complex <b>2</b> .....                                              | <b>4S</b>  |
| <b>Table 4S.</b> Hydrogen bonding table for complex <b>2</b> .....                                                  | <b>4S</b>  |
| <b>Figure 2S.</b> Scattered plot of complex <b>2</b> .....                                                          | <b>4S</b>  |
| <b>Table 5S.</b> Metal-Ligand bond distances in complex <b>3</b> .....                                              | <b>5S</b>  |
| <b>Table 6S.</b> Hydrogen bonding table for complex <b>3</b> .....                                                  | <b>5S</b>  |
| <b>Figure 3S.</b> Scattered plot of complex <b>3</b> .....                                                          | <b>6S</b>  |
| <b>Table 7S.</b> Metal-Ligand bond distances in complex <b>4</b> .....                                              | <b>6S</b>  |
| <b>Table 8S.</b> Hydrogen bonding table for complex <b>4</b> .....                                                  | <b>7S</b>  |
| <b>Figure 4S.</b> Scattered plot of complex <b>4</b> .....                                                          | <b>7S</b>  |
| <b>Figure 5S.</b> ESI-MS spectrum of <b>L</b> <sup>1</sup> .....                                                    | <b>8S</b>  |
| <b>Figure 6S.</b> <sup>1</sup> H-NMR spectrum of <b>L</b> <sup>1</sup> .....                                        | <b>9S</b>  |
| <b>Figure 7S.</b> <sup>13</sup> C-NMR spectrum of <b>L</b> <sup>1</sup> .....                                       | <b>10S</b> |
| <b>Figure 8S.</b> ESI-MS spectrum of <b>L</b> <sup>2</sup> .....                                                    | <b>11S</b> |
| <b>Figure 9S.</b> <sup>1</sup> H-NMR spectrum of <b>L</b> <sup>2</sup> .....                                        | <b>12S</b> |
| <b>Figure 10S.</b> <sup>13</sup> C-NMR spectrum of <b>L</b> <sup>2</sup> .....                                      | <b>13S</b> |
| <b>Figure 11S.</b> FT-IR spectrum of complex <b>1</b> .....                                                         | <b>14S</b> |
| <b>Figure 12S.</b> FT-IR spectrum of complex <b>2</b> .....                                                         | <b>15S</b> |
| <b>Figure 13S.</b> FT-IR spectrum of complex <b>3</b> .....                                                         | <b>16S</b> |
| <b>Figure 14S.</b> FT-IR spectrum of complex <b>4</b> .....                                                         | <b>17S</b> |
| <b>Figure 15S.</b> Comparison of FT-IR spectra of complexes <b>1</b> , <b>1'</b> , <b>1''</b> and <b>1'''</b> ..... | <b>18S</b> |

**Table 1S.** Metal-Ligand bond distances in complex **1**

| Atoms   | Distance (Å) |
|---------|--------------|
| Cu1 -O3 | 2.2469       |
| Cu1 -O5 | 2.4112       |
| Cu1 -N1 | 2.0223       |

**Table 2S.** Hydrogen bonding table for complex **1**

| D-H...A            | d(H-A) Å | d(D-A) Å | <DHA (°) |
|--------------------|----------|----------|----------|
| N(2) --H(2) ..O(2) | 2.44     | 3.24     | 156      |
| N(3) --H(3) ..O(2) | 2.00     | 2.85     | 177      |
| C(1) --H(1) ..O(4) | 2.23     | 2.99     | 138      |

**Figure 1S.** Scattered plot of complex **1**

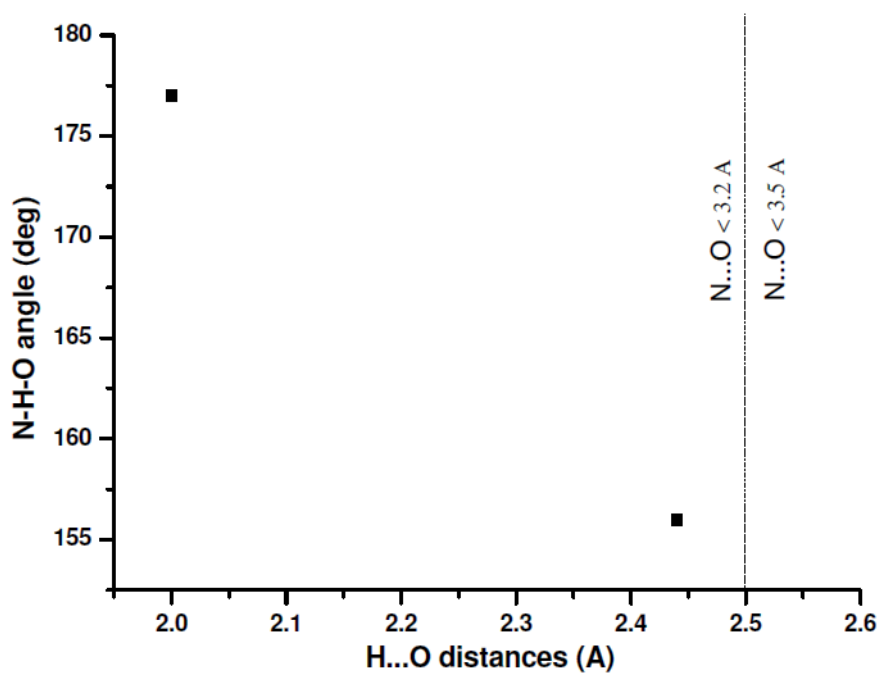

**Table 3S.** Metal-Ligand bond distances in complex **2**

| Atoms   | Distance (Å) |
|---------|--------------|
| Cd1 -O3 | 2.2699       |
| Cd1 -O4 | 2.2687       |
| Cd1 -N1 | 2.3394       |
| Cd1 -N2 | 2.3812       |

**Table 4S.** Hydrogen bonding table for complex **2**

| D-H...A             | d(H-A) Å | d(D-A) Å | <DHA (°) |
|---------------------|----------|----------|----------|
| N(3) --H(3) ..O(1)  | 2.20     | 3.02     | 161      |
| N(4) --H(4) ..O(1)  | 1.95     | 2.81     | 173      |
| N(5) --H(5) ..O(2)  | 2.16     | 2.98     | 160      |
| N(6) --H(6) ..O(2)  | 1.97     | 2.83     | 180      |
| C(3) --H(3A) ..O(1) | 2.48     | 2.83     | 142      |

**Figure 2S.** Scattered plot of complex **2**

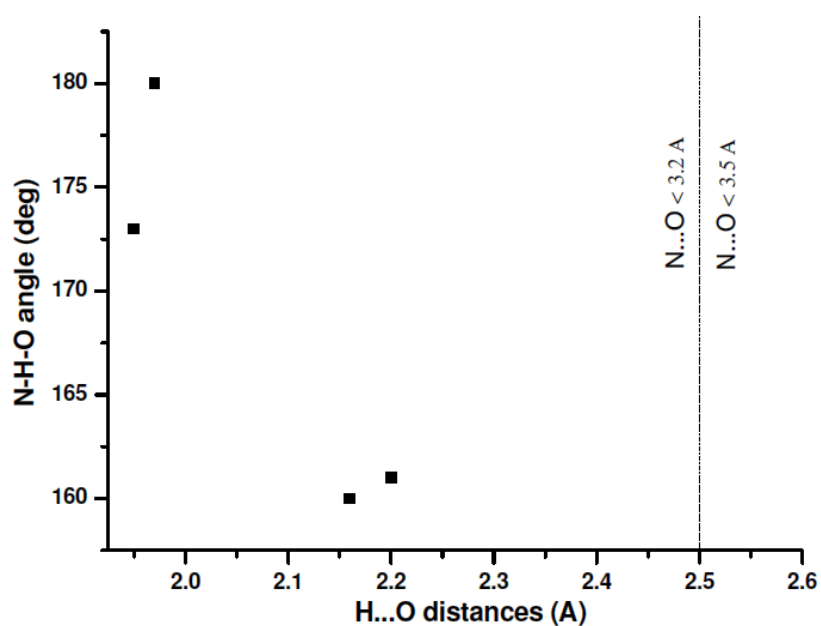

**Table 5S.** Metal-Ligand bond distances in complex **3**

| Atoms    | Distance (Å) |
|----------|--------------|
| Cu1 -N1  | 2.0178       |
| Cu1 -N2  | 2.0140       |
| Cu1 -N3  | 2.0183       |
| Cu1 -N4  | 2.0350       |
| Cu1 -N13 | 2.5759       |
| Cu1 -N16 | 2.6716       |

**Table 6S.** Hydrogen bonding table for complex **3**

| D-H...A               | d(H-A) Å | d(D-A) Å | <DHA (°) |
|-----------------------|----------|----------|----------|
| N(5) --H(5) ..O(4)    | 1.94     | 2.79     | 174      |
| N(6) --H(6) ..O(3)    | 2.14     | 2.97     | 162      |
| N(7) --H(7) ..O(1)    | 2.03     | 2.80     | 149      |
| N(8) --H(8A) ..O(1)   | 2.14     | 2.95     | 156      |
| N(8) --H(8A) ..O(2)   | 2.42     | 3.09     | 136      |
| N(9) --H(9) ..O(1)    | 2.01     | 2.85     | 168      |
| N(10) --H(10) ..O(4)  | 1.98     | 2.84     | 177      |
| N(11) --H(11) ..O(2)  | 2.01     | 2.83     | 160      |
| N(12) --H(12) ..O(3)  | 2.15     | 3.00     | 171      |
| C(8) --H(8) ..O(3)    | 2.53     | 3.24     | 135      |
| C(11) --H(11A) ..O(1) | 2.55     | 3.47     | 169      |

**Figure 3S.** Scattered plot of complex **3**

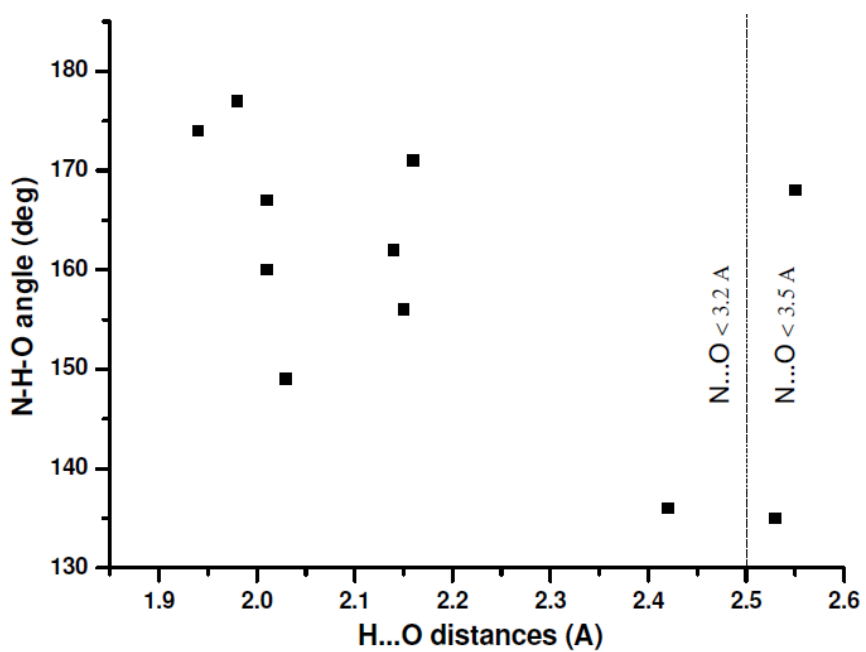

**Table 7S.** Metal-Ligand bond distances in complex **4**

| Atoms   | Distance (Å) |
|---------|--------------|
| Co1 -O1 | 2.1106       |
| Co1 -O2 | 2.1131       |
| Co1 -N1 | 2.1467       |

**Table 8S.** Hydrogen bonding table for complex **4**

| D-H...A               | d(H-A) Å | d(D-A) Å | <DHA (°) |
|-----------------------|----------|----------|----------|
| N(2) --H(2) ..O(4A)   | 2.04     | 2.90     | 173      |
| N(3) --H(3) ..O(5A)   | 2.15     | 2.98     | 160      |
| C(8) --H(8) ..O(5A)   | 2.46     | 3.24     | 142      |
| C(11) --H(11) ..O(3)  | 2.35     | 3.26     | 165      |
| C(16) --H(16C) ..N(4) | 2.59     | 3.50     | 158      |

**Figure 4S.** Scattered plot of complex **4**

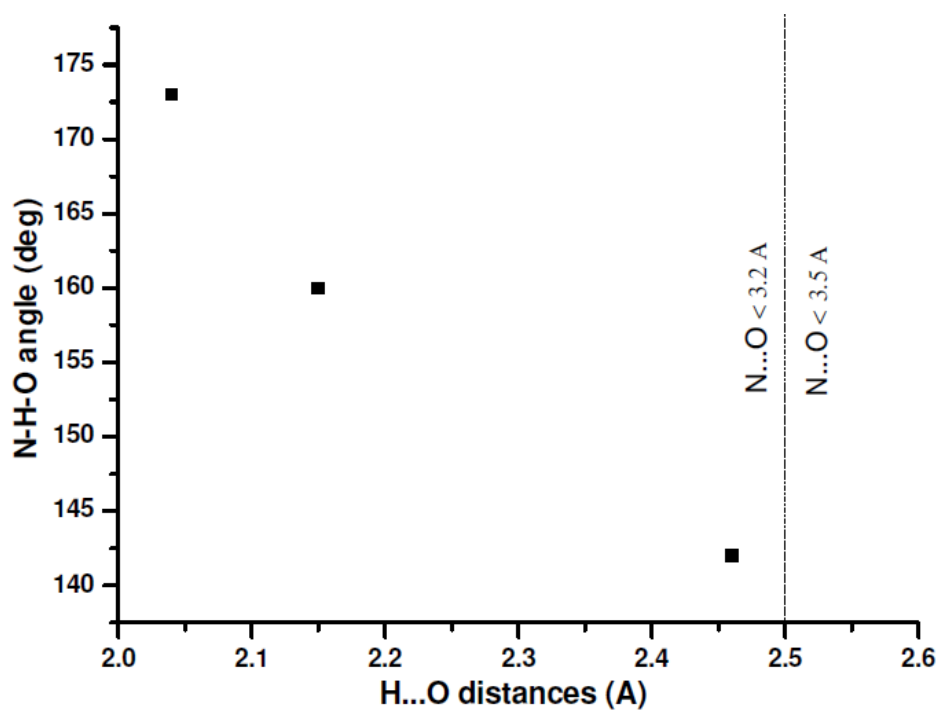

Figure 5S. ESI-MS spectrum of L<sup>1</sup>

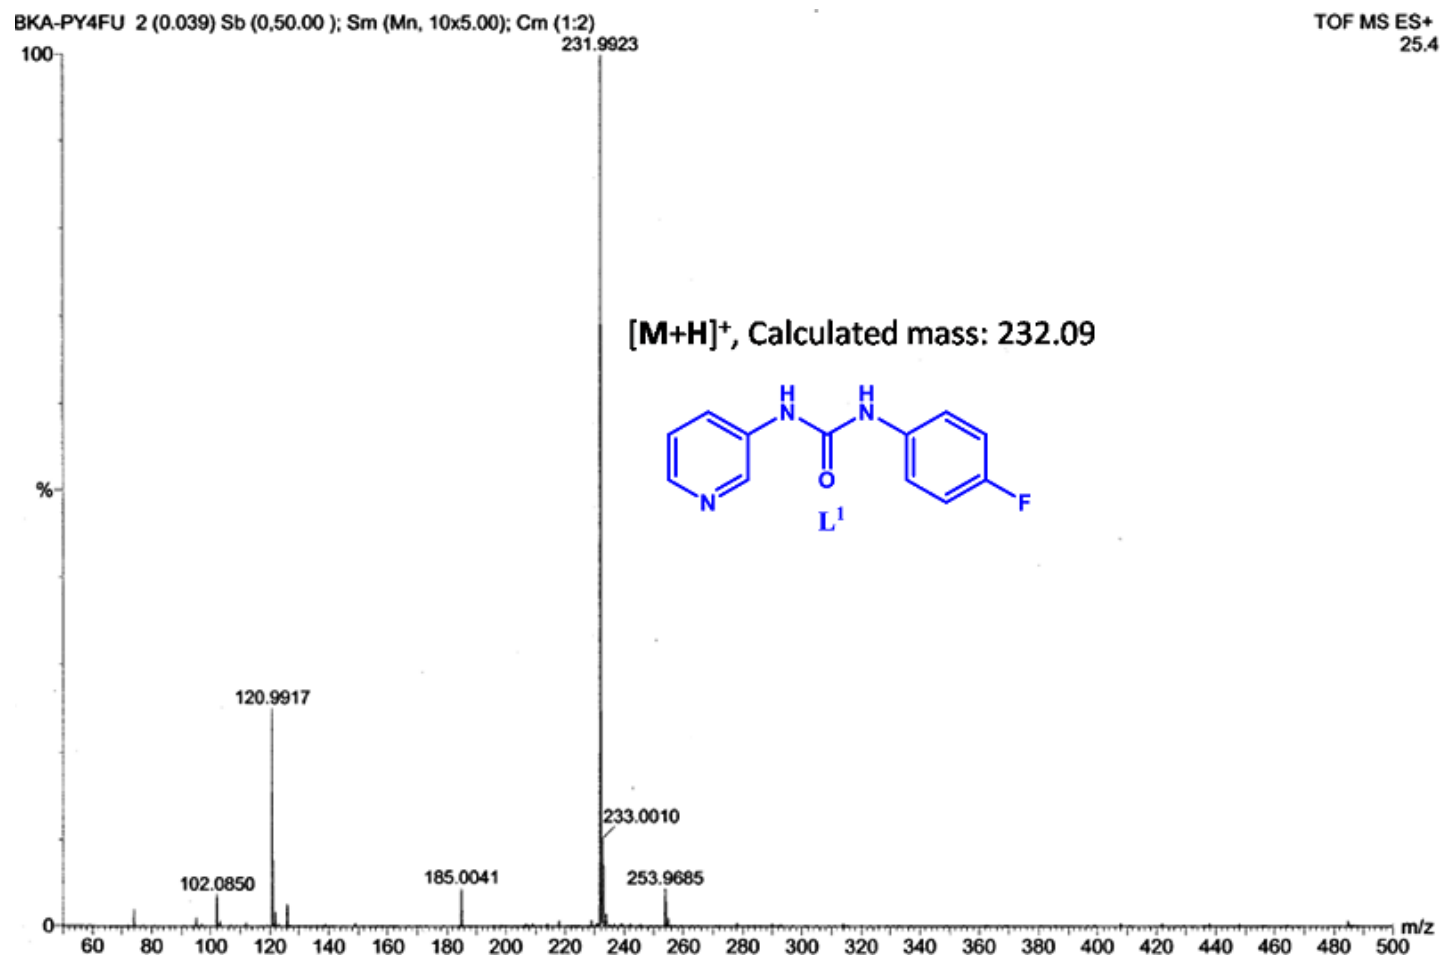



Figure 6S.  $^1\text{H-NMR}$  spectrum of  $\text{L}^1$

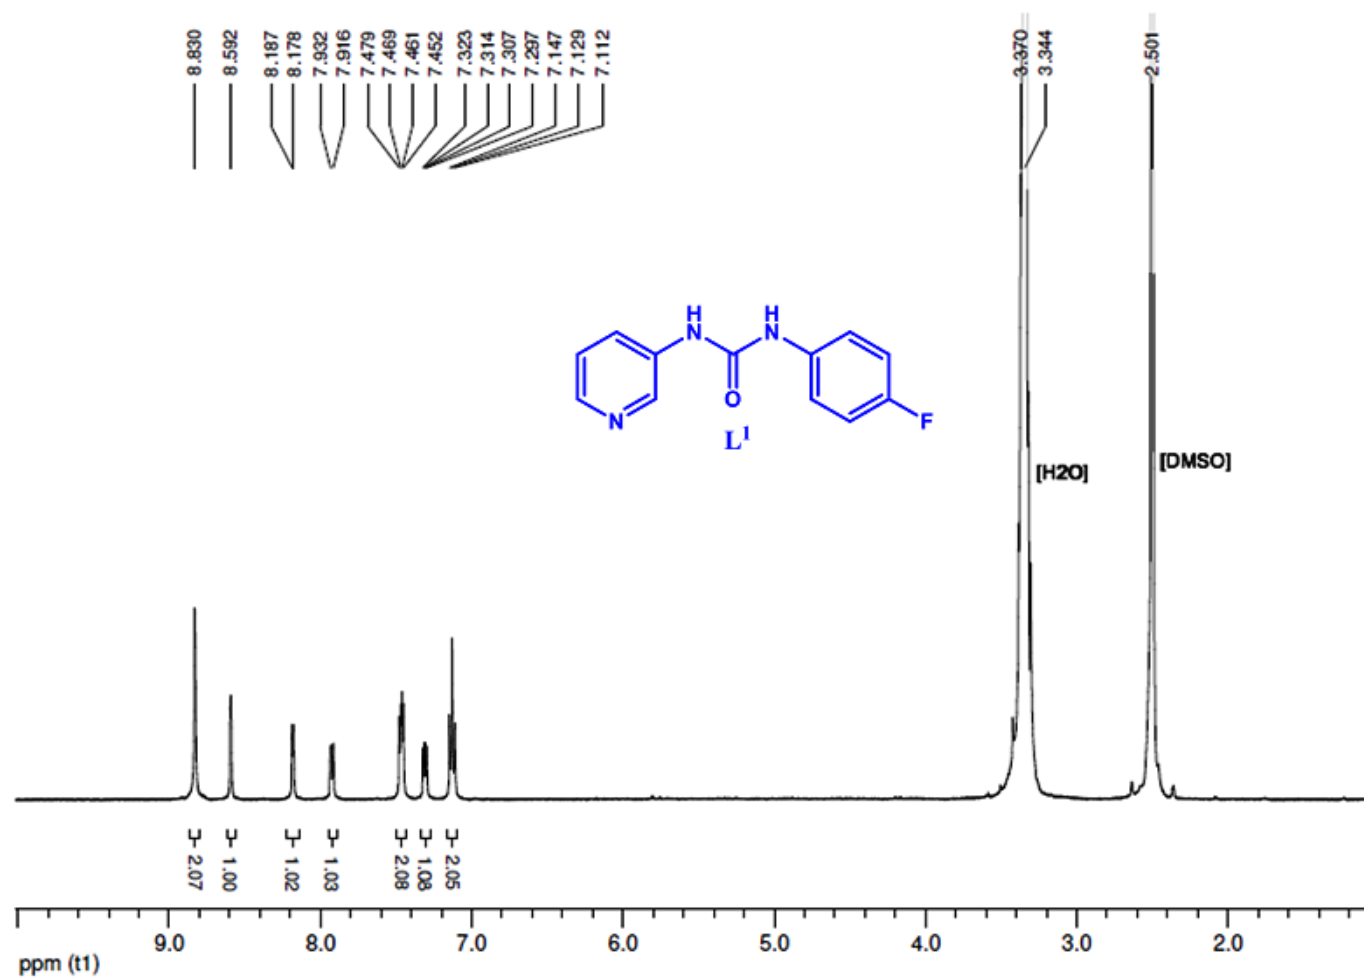

Figure 7S.  $^{13}\text{C}$ -NMR spectrum of  $\text{L}^1$

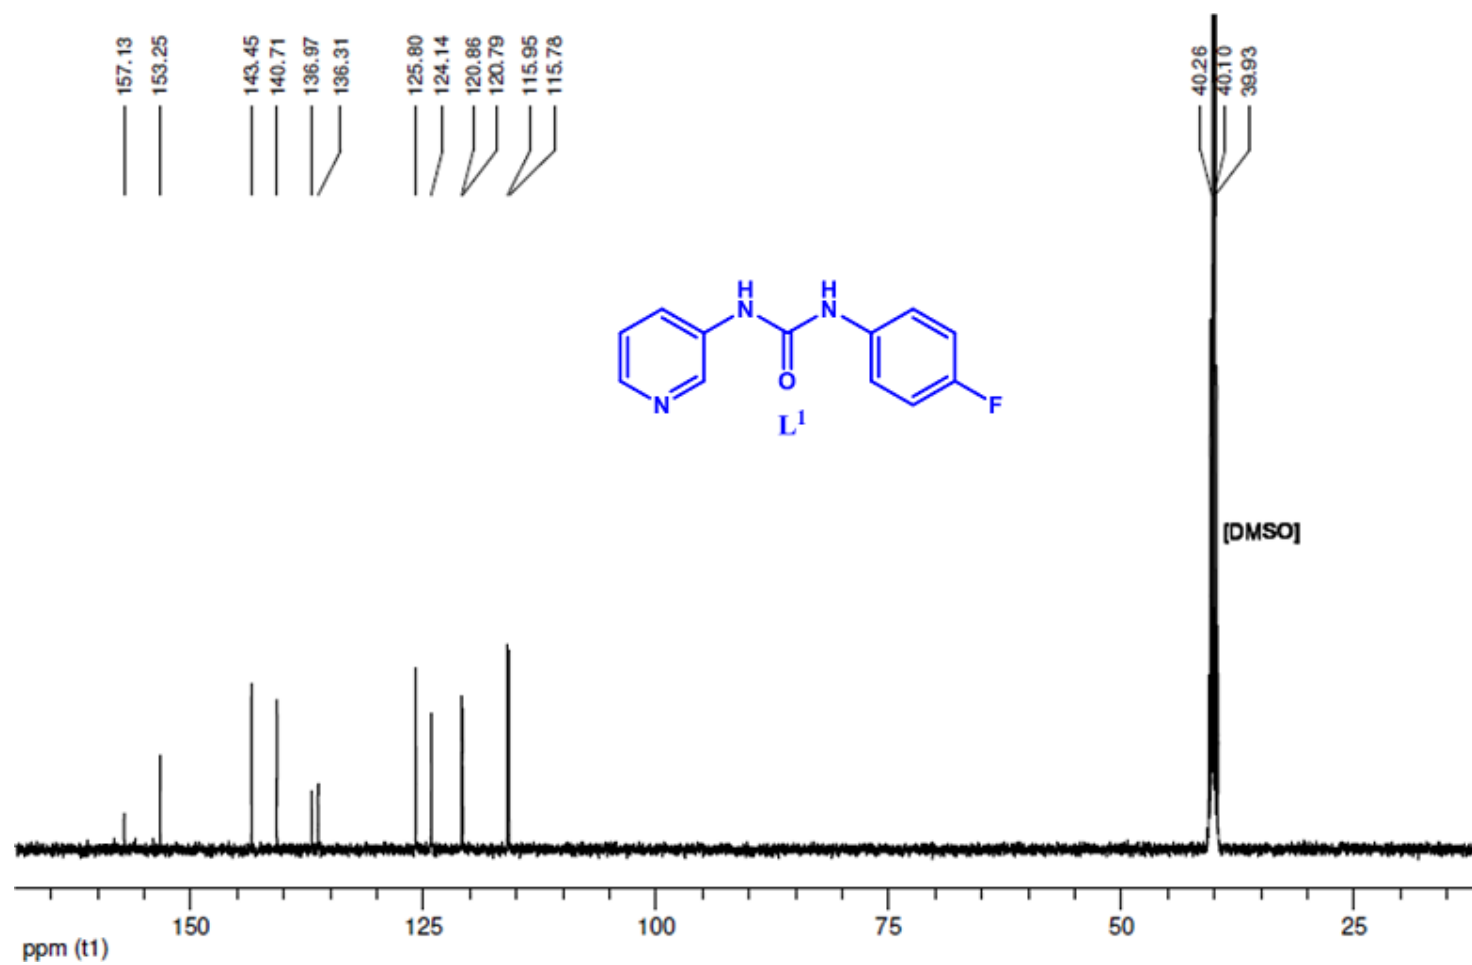

Figure 8S. ESI-MS spectrum of  $L^2$

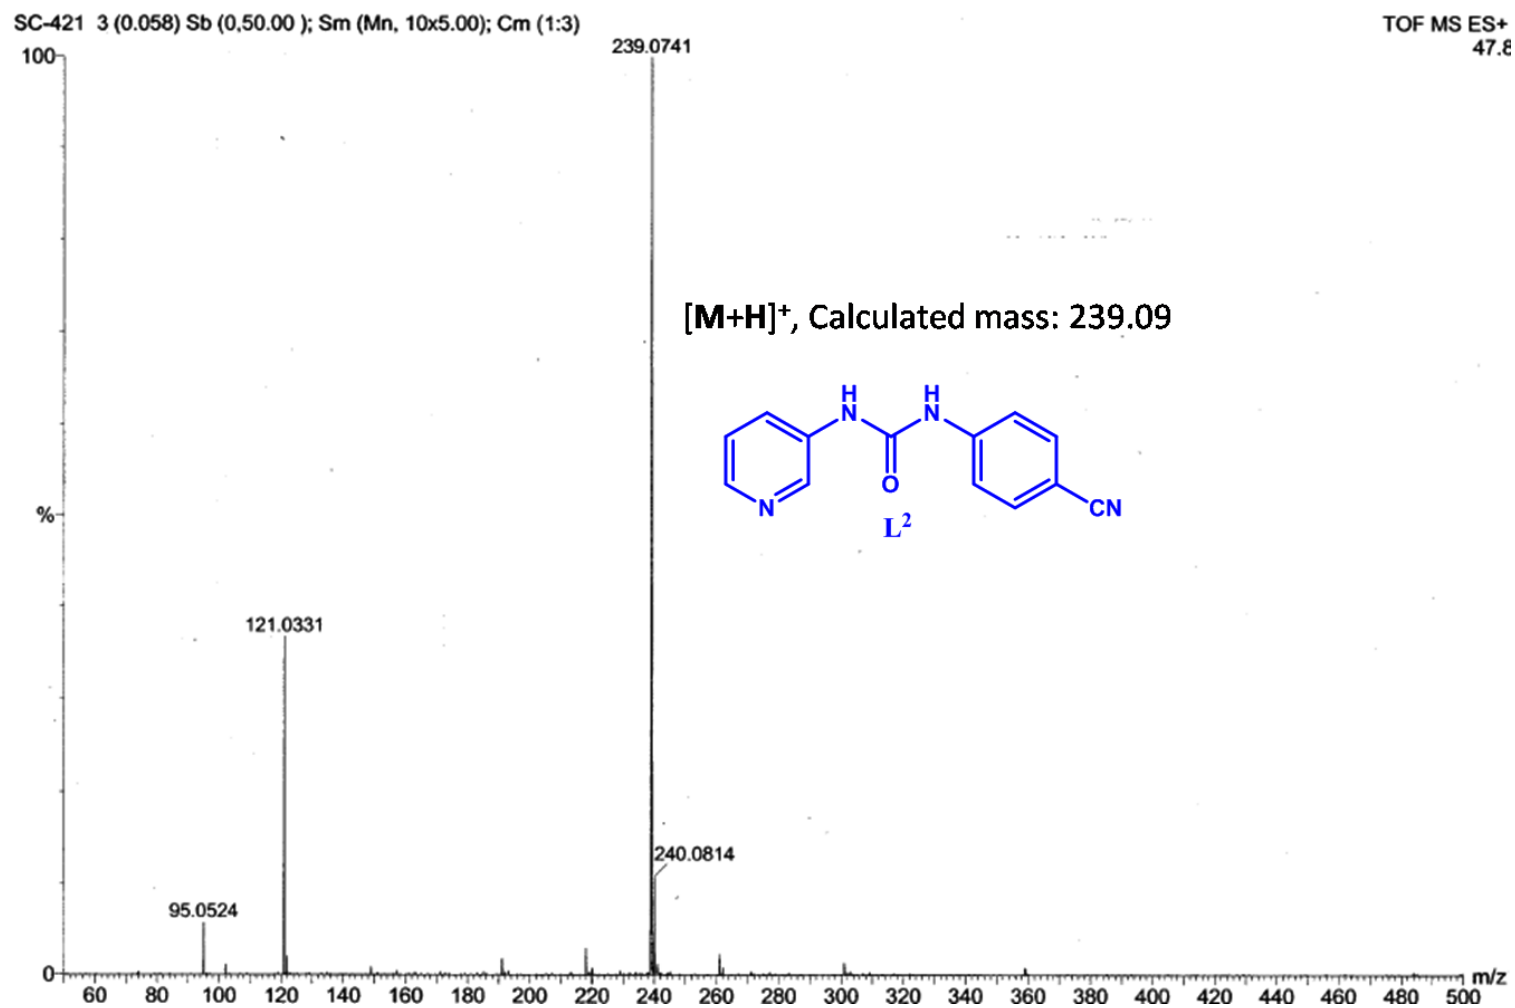

Figure 9S:  $^1\text{H-NMR}$  spectrum of  $\text{L}^2$

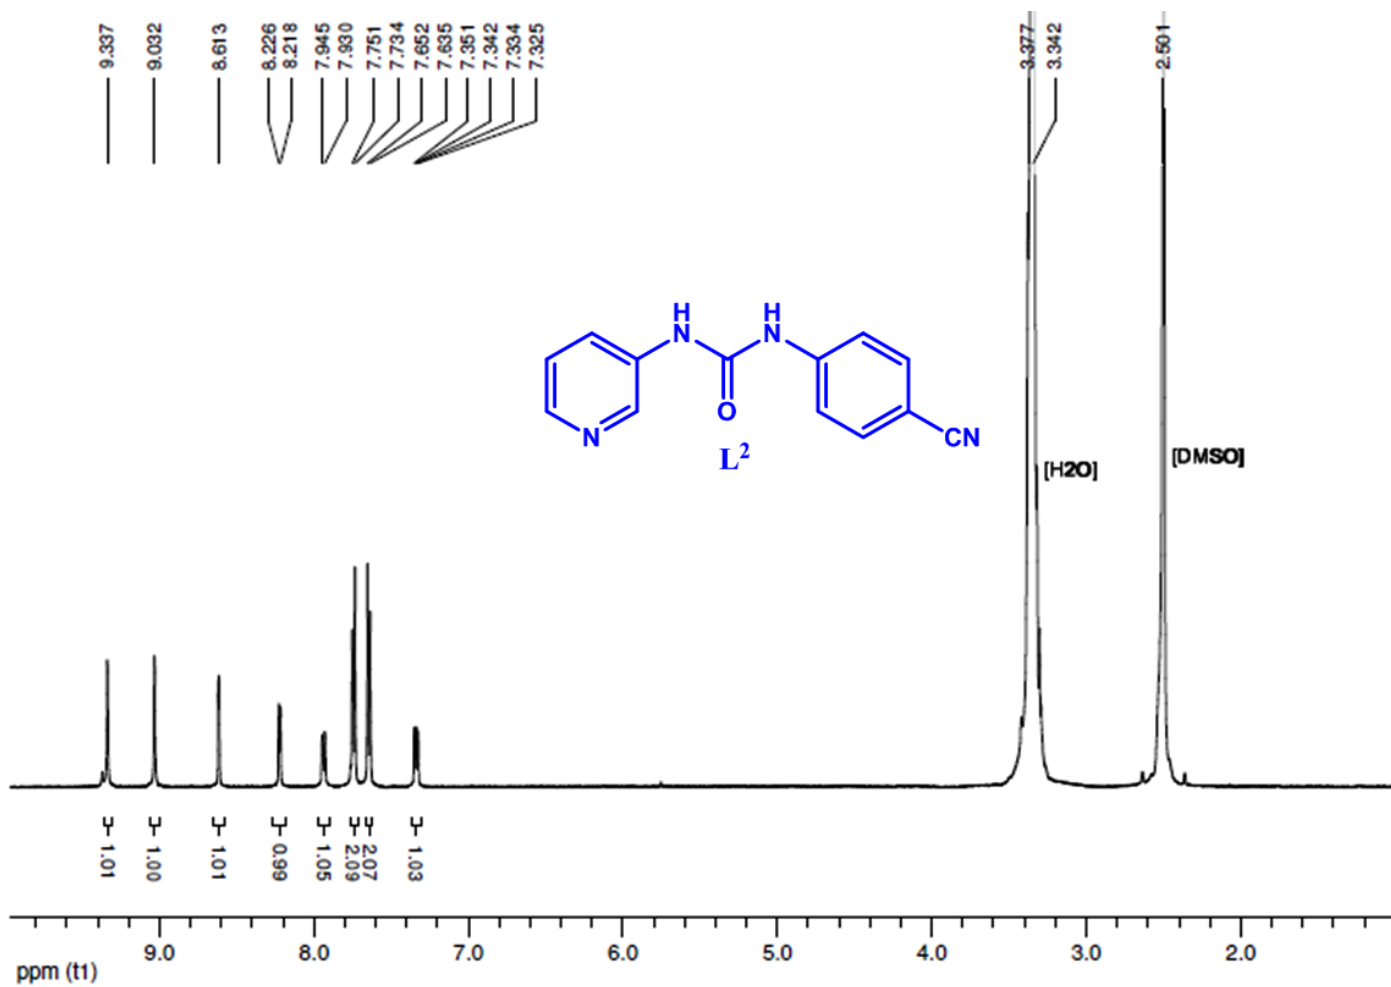

Figure 10S.  $^{13}\text{C}$ -NMR spectrum of  $\text{L}^2$

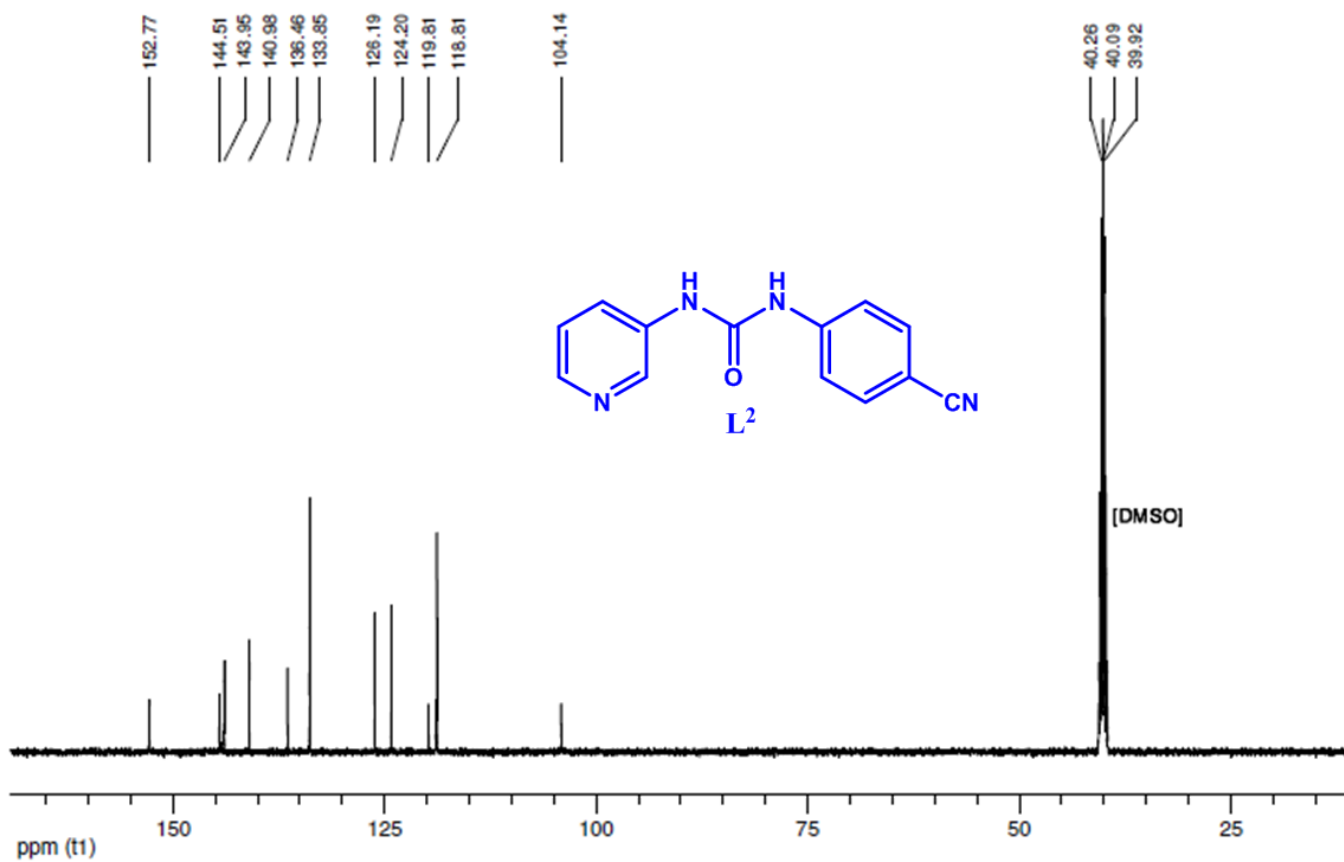

**Figure 11S.** FT-IR spectrum of complex **1**

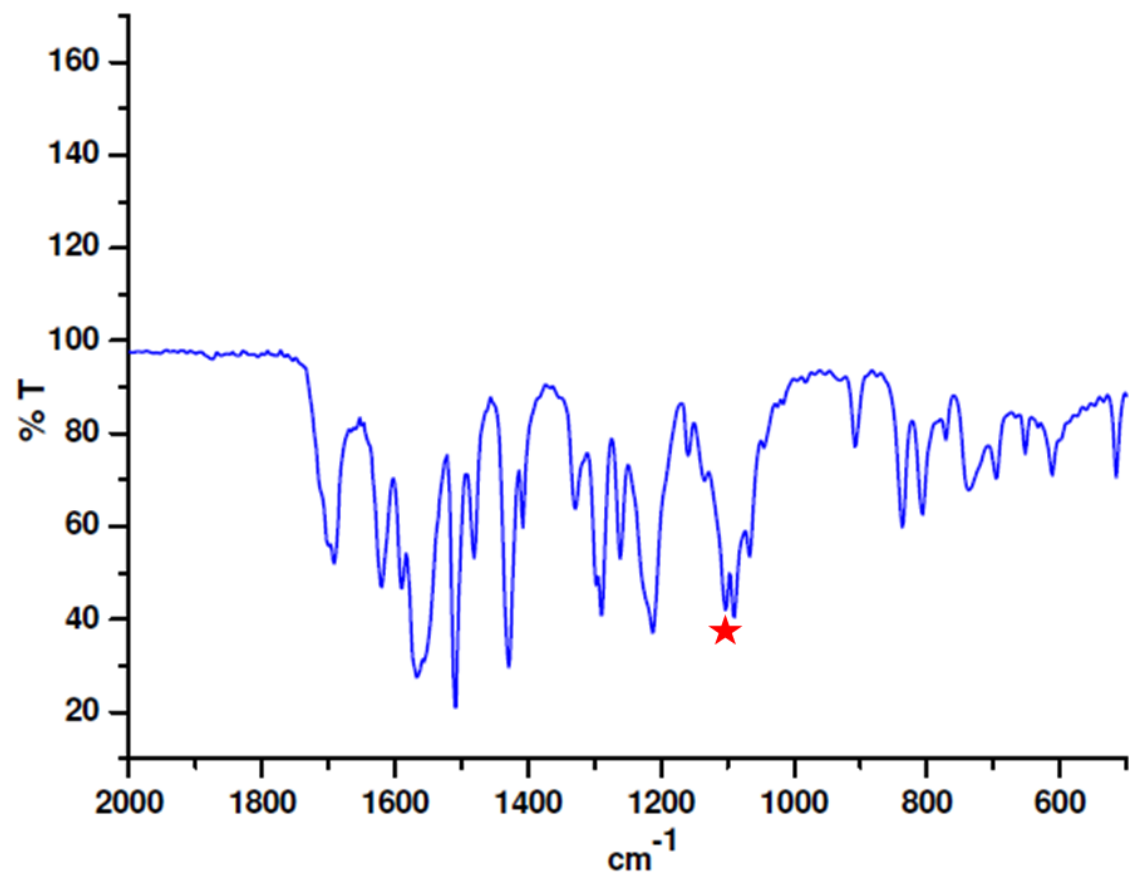

Peak at 1100 cm<sup>-1</sup> (symmetric stretching frequency of SO<sub>4</sub><sup>2-</sup>) indicate the presence of SO<sub>4</sub><sup>2-</sup>.

**Figure 12S.** FT-IR spectrum of complex **2**

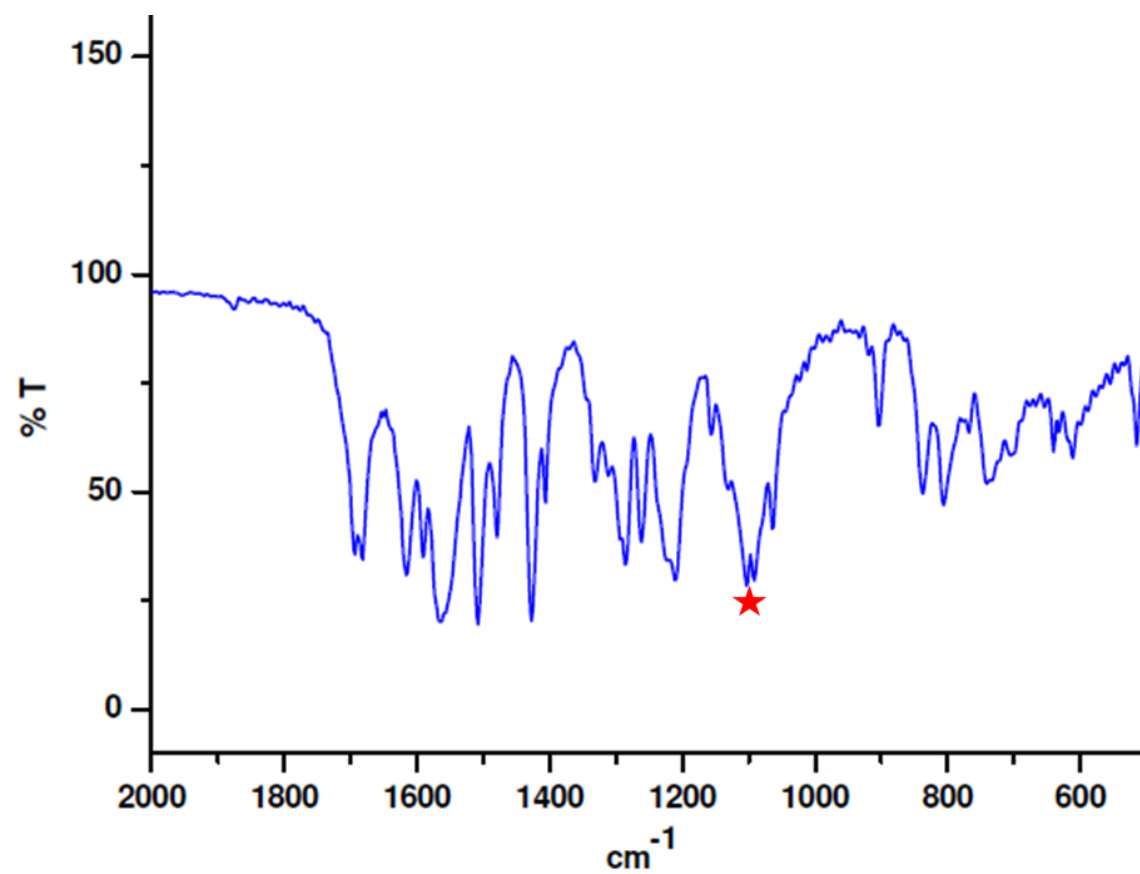

Peak at  $1105\text{ cm}^{-1}$  (symmetric stretching frequency of  $\text{SO}_4^{2-}$ ) indicate the presence of  $\text{SO}_4^{2-}$ .

**Figure 13S.** FT-IR spectrum of complex **3**

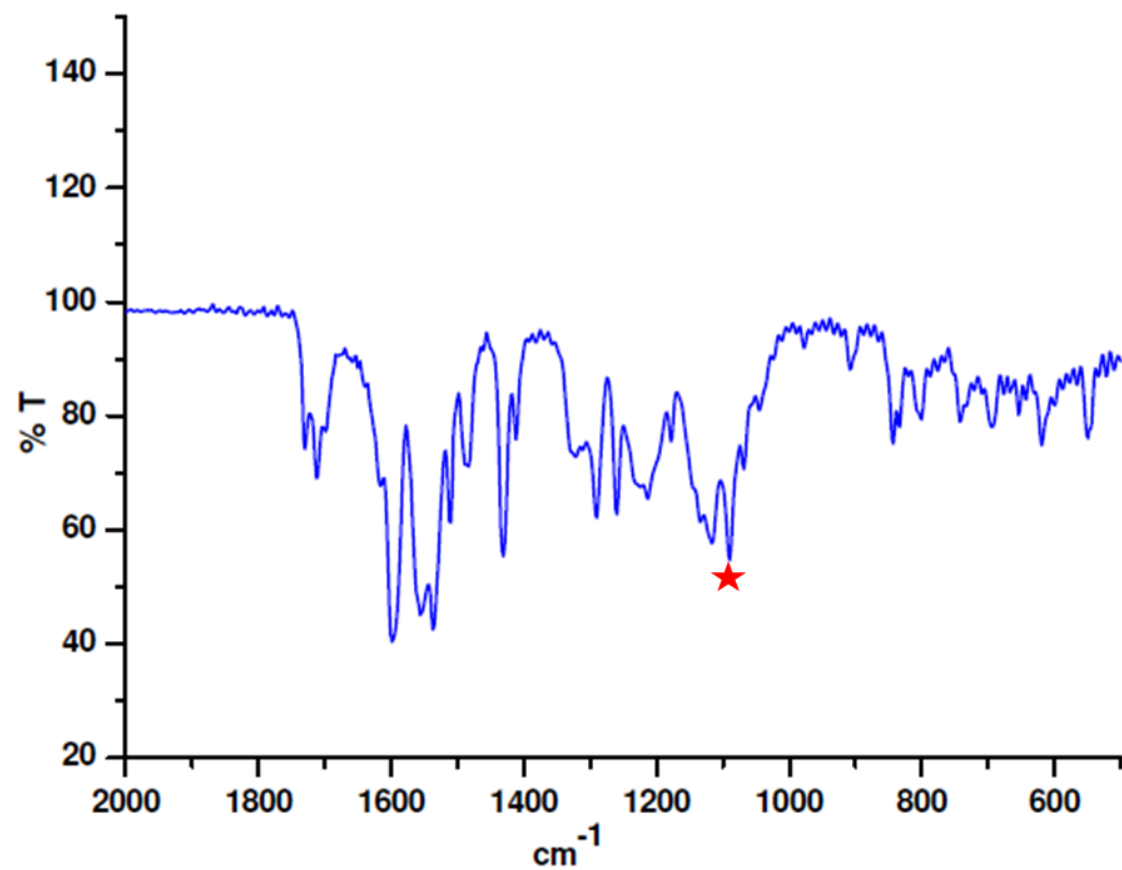

Peak at  $1116\text{ cm}^{-1}$  (symmetric stretching frequency of  $\text{SO}_4^{2-}$ ) indicate the presence of  $\text{SO}_4^{2-}$ .



**Figure 14S.** FT-IR spectrum of complex **4**

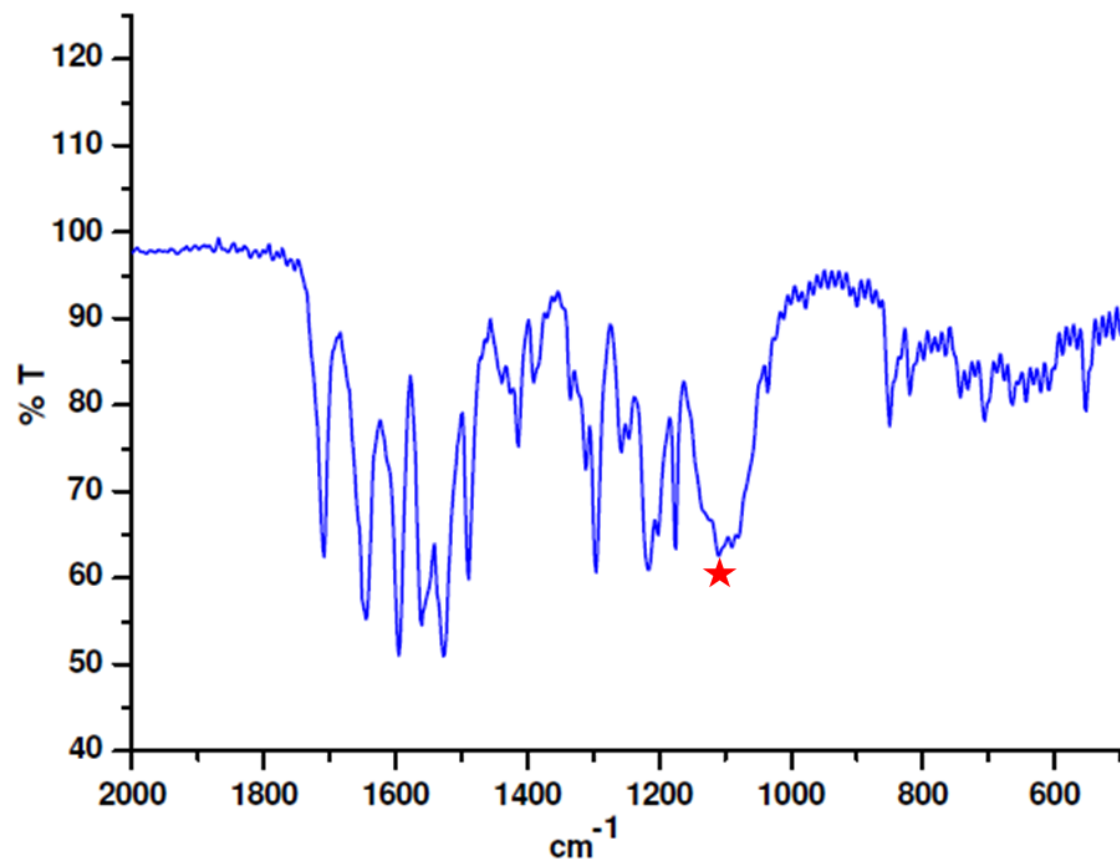

Peak at 1110 cm<sup>-1</sup> (symmetric stretching frequency of SO<sub>4</sub><sup>2-</sup>) indicate the presence of SO<sub>4</sub><sup>2-</sup>.

Figure 15S. Comparison of FT-IR spectra of complexes 1, 1', 1'' and 1'''

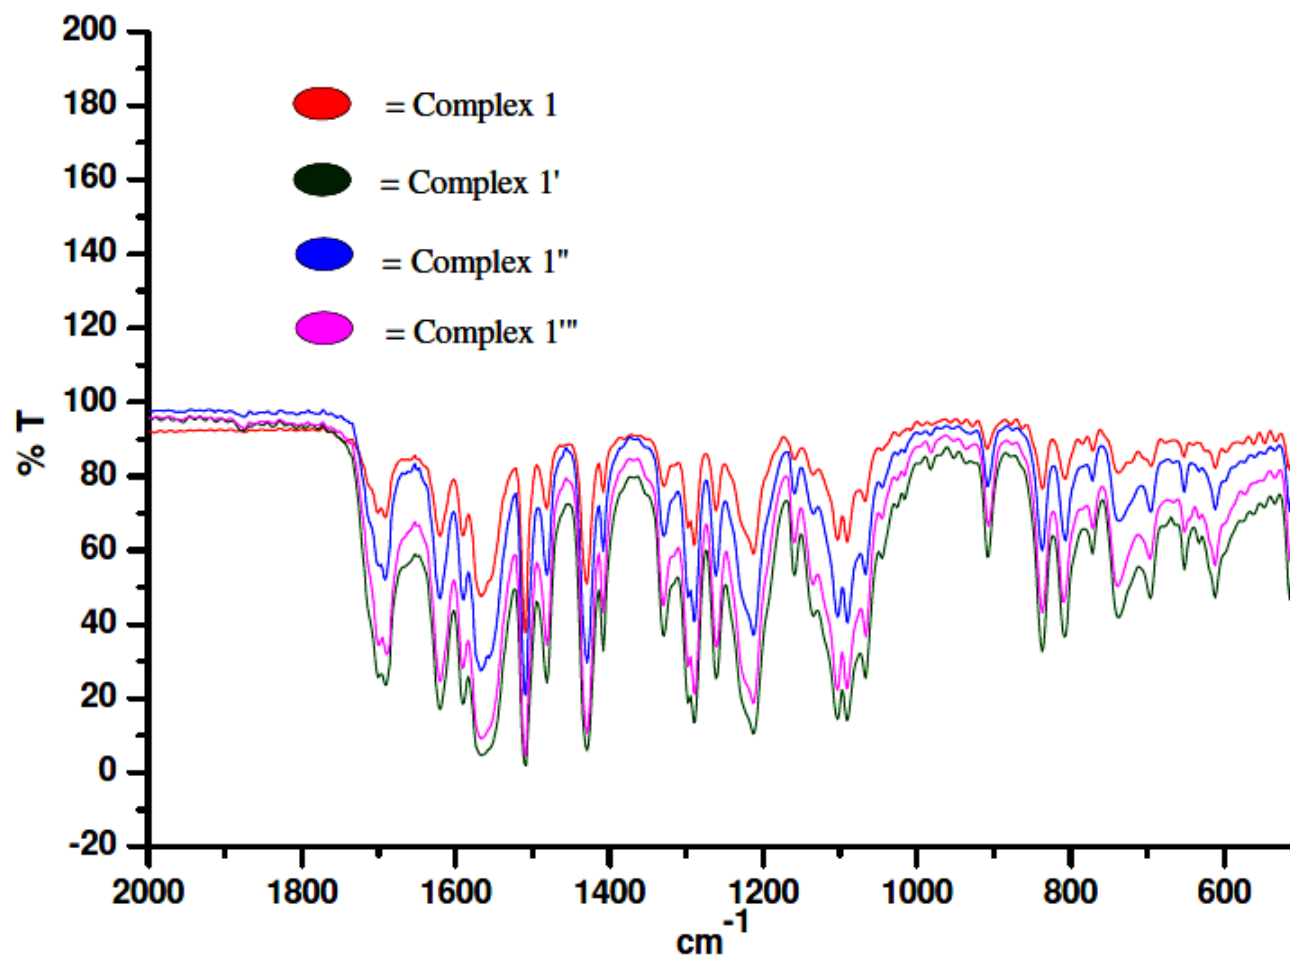

Supplement: c3ce40974k.pdf [file c3ce40974k.pdf]
